# Supplementary material for: Stable and efficient soft perovskite crystalline film based solar cells prepared with a facile encapsulation method
Source: Royal Society of Chemistry journal article supplement (doi:10.1039/d2nr04917a), 2022-01-01
Supplement: d2nr04917a1.pdf [file d2nr04917a1.pdf]

## Supporting information

### **Stable and efficient soft perovskite crystalline film based solar cells with a facile encapsulation method**

Diksha Thakur<sup>1,3</sup>, Qi Bin Ke<sup>1,2,3</sup>, Shou-En Chiang<sup>1,2,3</sup>, Tzu-Han Tseng<sup>1</sup>, Kun-Bin Cai<sup>1</sup>,  
Chi-Tsu Yuan<sup>1,2</sup>, Jyh-Shyang Wang<sup>1,2</sup>, Sheng Hsiung Chang<sup>1,2,3,\*</sup>

<sup>1</sup>Department of Physics, Chung Yuan Christian University, Taoyuan 320314, Taiwan,  
ROC

<sup>2</sup>Research Center for Semiconductor Materials and Advanced Optics, Chung Yuan  
Christian University, Taoyuan 320314, Taiwan, ROC

<sup>3</sup>Center for Nanotechnology and R&D Center for Membrane Technology, Chung  
Yuan Christian University, Taoyuan 320314, Taiwan, ROC

[\\*shchang@cycu.edu.tw](mailto:shchang@cycu.edu.tw)

Corresponding authors: Sheng Hsiung Chang

Telephone: +886-3-2653208

Fax : 886-3-2653299

### Optical layout of the reflectance spectrometer

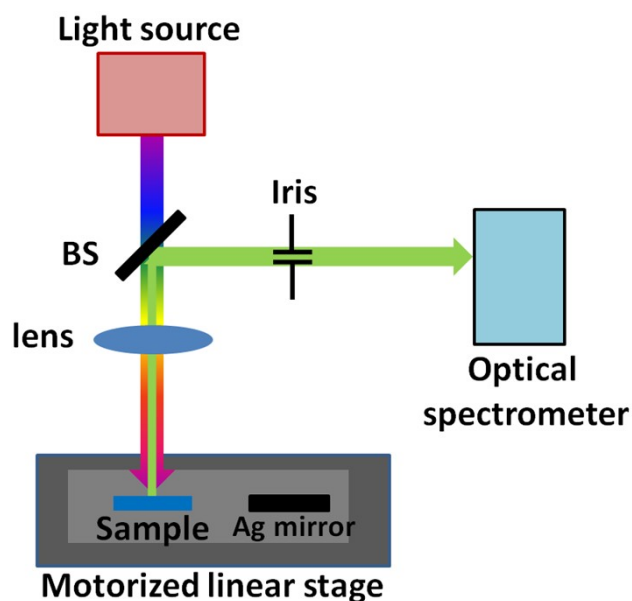

**Fig. S1.** Optical layout of the reflectance spectrometer. The light source (SLS301, Thorlabs) emits a broadband spectrum (360 nm – 3800 nm). The beam splitter (BS) is used to collect the reflected beam from the sample (or Ag mirror). The lens is used to collimate the light source. The Ag mirror is used as the reference of the reflectance spectrum. The Ag mirror and sample are mounted on a motorized linear stage with two mirror mounts. The iris is used to reduce the optical noise. The optical spectrometer (Mars TB3000+, GIE) is used to measure the spectrum of the reflected beam.

### Day-dependent $R_s$ of the inverted perovskite solar cells

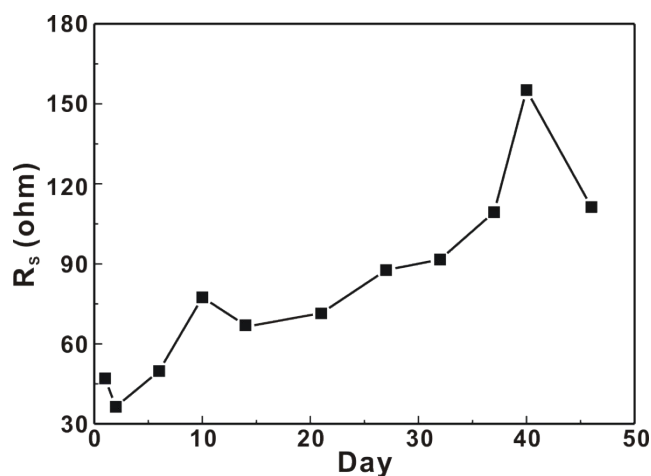

**Fig. S2.** Day-dependent series resistance ( $R_s$ ) of the inverted perovskite solar cells. The sample was encapsulated on the second day.

### Schematic diagram of the MAPbI<sub>3</sub>/P3CT-Na/ITO tri-layer structure

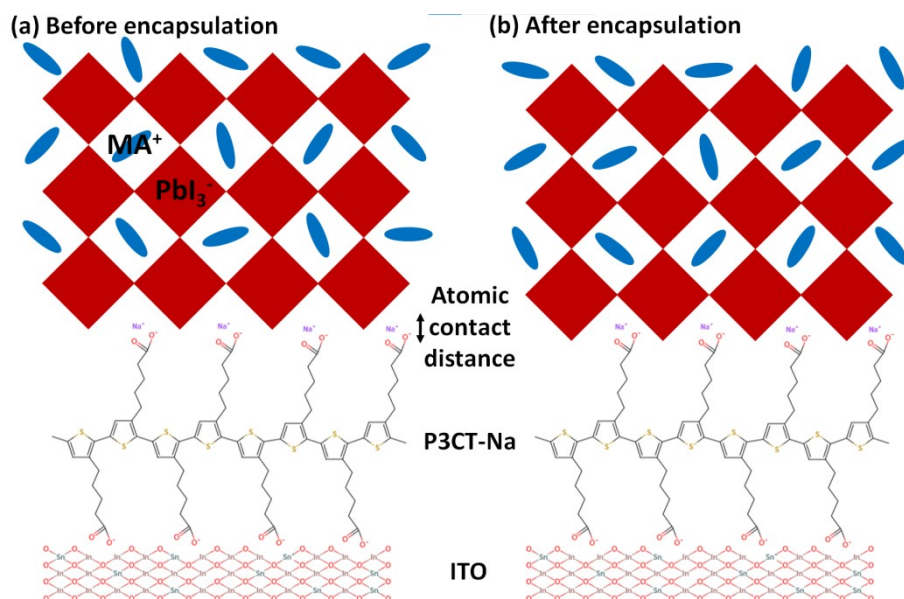

**Fig. S3.** Schematic diagrams of the MAPbI<sub>3</sub>/P3CT-Na/ITO tri-layer structure with the different atomic contact distances.

### Day-dependent PCE of the inverted MAPbI<sub>3</sub> solar cells with and without the encapsulation method

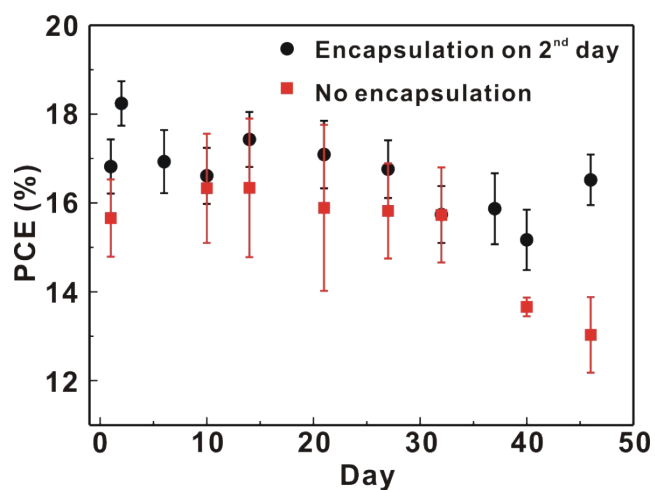

**Fig. S4.** Day-dependent PCE of the inverted MAPbI<sub>3</sub> solar cells with and without the facile encapsulation method.

## Atomic-force microscopic images

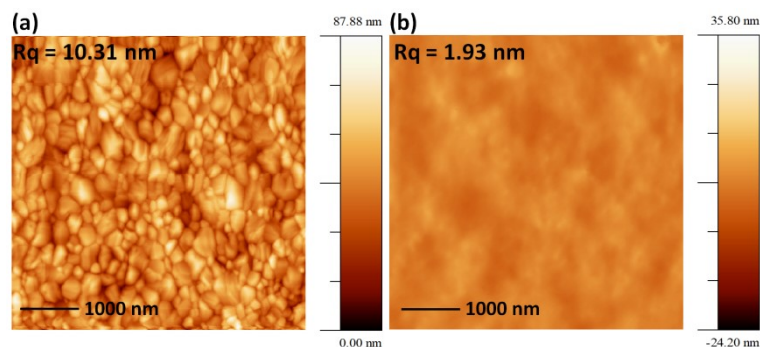

**Fig. S5.** Atomic-force microscopic images. (a) MAPbI<sub>3</sub>/P3CT-Na/ITO/glass; (b) BCP:PCBM/MAPbI<sub>3</sub>/P3CT-Na/ITO/glass.

## X-ray diffraction patterns

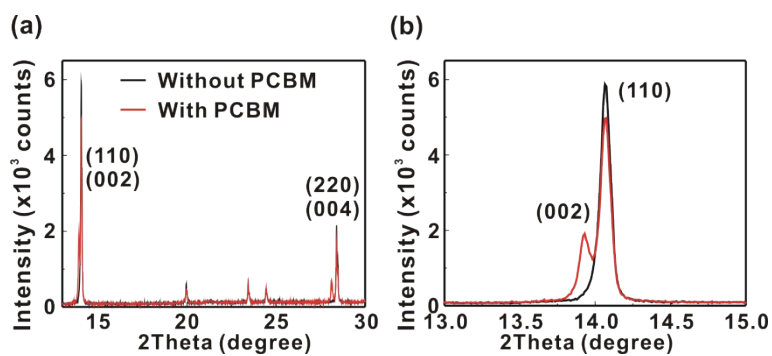

**Fig. S6.** X-ray diffraction patterns of the MAPbI<sub>3</sub>/P3CT-Na/ITO/glass and BCP:PCBM/MAPbI<sub>3</sub>/P3CT-Na/ITO/glass samples.
